# Supplementary material for: Bond clusters control rupture force limit in shear loaded histidine-Ni2+ metal-coordinated proteins
Source: Royal Society of Chemistry journal article supplement (doi:10.1039/d3nr01287e), 2023-01-01
Supplement: d3nr01287e3.xlsx [file d3nr01287e3.xlsx]

## Sheet: Statistics
Metal	Number of sites	Number of atoms	Number of PDB structures	Ratio of # sites / # pdb structures	Number of representative sites
Zn	40362	44512	14908	2.70741	5436
Mg	149842	175718	14574	10.2815	7924
Ca	31506	36356	10778	2.92318	4509
Fe	25262	41331	8594	2.93949	1208
Na	23279	25076	8038	2.89612	4942
Mn	11053	14007	3441	3.21215	1112
K	8266	9421	2638	3.13343	1142
Ni	3615	3878	1829	1.97649	863
Cu	4850	6610	1585	3.05994	476
Co	3197	3594	1201	2.66195	515
Cd	4804	5674	974	4.93224	1822
Hg	2069	2439	660	3.13485	671
Pt	763	944	266	2.86842	233
Mo	558	948	236	2.36441	65
Al	428	432	209	2.04785	85
Be	583	584	207	2.81643	75
Ba	849	981	184	4.61413	100
Ru	283	327	166	1.70482	65
V	292	515	161	1.81366	79
Sr	3708	4007	157	23.6178	144
Cs	651	699	122	5.33607	138
W	334	1952	108	3.09259	116
Yb	233	258	99	2.35354	51
Au	373	457	99	3.76768	146
Li	130	133	77	1.68831	66
Gd	236	294	72	3.27778	87
Pb	205	231	62	3.30645	94
U	366	442	60	6.1	59
Y	200	221	59	3.38983	82
Ir	396	422	59	6.71186	75
Tl	273	402	55	4.96364	51
Rb	213	273	54	3.94444	56
Ag	130	275	45	2.88889	47
Sm	176	195	44	4	81
Os	3620	3995	38	95.2632	74
Pr	66	78	32	2.0625	42
Pd	77	122	27	2.85185	36
Eu	72	80	26	2.76923	39
Tb	113	116	24	4.70833	35
Re	76	84	23	3.30435	34
Ta	102	613	21	4.85714	74
Rh	55	68	20	2.75	24
Lu	53	65	16	3.3125	21
Ho	32	39	13	2.46154	20
Cr	25	26	11	2.27273	12
Ga	17	21	11	1.54545	7
La	21	27	11	1.90909	11
Sn	18	21	10	1.8	4
Sb	20	22	10	2	7
Ce	7	7	4	1.75	3
Zr	12	31	3	4	2
Er	18	18	3	6	4
Th	9	9	3	3	2
Ti	3	3	2	1.5	1
In	3	3	2	1.5	2
Hf	10	44	2	5	3
Sc	1	1	1	1	1
Dy	24	30	1	24	7
Bi	1	1	1	1	1
Pa	1	1	1	1	1
Pu	3	3	1	3	1
Am	6	6	1	6	1
Cm	6	6	1	6	1
Cf	3	3	1	3	1
Ge	0	0	0	0	0
Nb	0	0	0	0	0
Tc	0	0	0	0	0
Nd	0	0	0	0	0
Pm	0	0	0	0	0
Tm	0	0	0	0	0
Po	0	0	0	0	0
Fr	0	0	0	0	0
Ra	0	0	0	0	0
Ac	0	0	0	0	0
Np	0	0	0	0	0
Bk	0	0	0	0	0
Es	0	0	0	0	0
Fm	0	0	0	0	0
Md	0	0	0	0	0
No	0	0	0	0	0
Lr	0	0	0	0	0
Rf	0	0	0	0	0
Db	0	0	0	0	0
Sg	0	0	0	0	0
All metals	316554	391011	57494	5.50586

## Sheet: Data
Metal Site ID	Nuclearity	Molecule Name	Organism Name	Function (if known)	Location	Max number of coordination bonds in linear arrangement	Bonds not in consecutive ordering	Notes	Dominating Metal		** Data from: https://metalpdb.cerm.unifi.it
1nl0_1	5	Coagulation factor IX			Within a chain	5	0		Ca
1ux6_1	5	Thrombospondin-1	Homo sapiens		Within a chain	2	3		Ca
1yo8_2	5	Thrombospondin-2	Homo sapiens		Within a chain	2	3		Ca
3amr_3	5	3-phytase	Bacillus subtilis		Within a chain	2	3		Ca
4alf_1	5	protein	Pseudomonas fluorescens Pf0-1		Within a chain	3	2		Ca
4mvm_1	5	Ion transport protein	Arcobacter butzleri RM4018		Within a chain	3	2		Ca
4o03_1	5	Prothrombin	Homo sapiens		Within a chain	5	0		Ca
4zma_1	5	Coagulation factor VII	Homo sapiens		Within a chain	5	0		Ca
5cbh_1	5	Ion transport 2 domain protein	Tsukamurella paurometabola		Interface	1	4		Ca
5cxl_2	5	Bifunctional hemolysin/adenylate cyclase	Bordetella pertussis		Within a chain	5	0	as consecutive side chains in B sheet	Ca
1dan_1	6	Coagulation factor VII	Homo sapiens		Within a chain	6	0		Ca
1iod_2	6	Coagulation factor X	Bos taurus		Interface	6	0		Ca
1j34_3	6	Coagulation factor IX	Bos taurus		Interface	6	0		Ca
1j35_2	6	Coagulation factor IX	Bos taurus		Interface	6	0		Ca
1lqv_1	6	Vitamin-K dependent protein C	Homo sapiens		Interface	6	0		Ca
1nl1_1	6	Prothrombin	Bos taurus		Within a chain	6	0		Ca
2a2q_1	6	Coagulation factor VII	Homo sapiens		Within a chain	6	0		Ca
3hhho_1	6	Co-chaperone protein hscB homolog	Vibrio cholerae		Interface	6	0		Ca
3jtc_1	6	Vitamin K-dependent protein C	Homo sapiens		Interface	6	0		Ca
3th2_4	6	Coagulation factor VII	Homo sapiens		No binding chains	6	0		Ca
3th4_1	6	Coagulation factor VII	Homo sapiens		Within a chain	6	0		Ca
3zwu_1	6	Putative uncharacterized protein	Pseudomonas fluorescens Pf0-1		Within a chain	3	3		Ca
3zwu_1	6	Putative uncharacterized protein	Pseudomonas fluorescens Pf0-1		Within a chain	3	3		Ca
4a9v_1	6	protein	Pseudomonas fluorescens Pf0-1		Within a chain	3	3		Ca
5cm7_1	6	Thiamine-monophosphate kinase	Acinetobacter baumannii		Interface	4	2		Ca
5cmw_3	6	Bifunctional hemolysin/adenylate cyclase	Bordetella pertussis		Within a chain	6	0		Ca
2iwk_4	5	Nitrous-oxide reductase	Achromobacter cycloclastes	Within a chain	Within a Chain	1	4		Cu
3k7r_1	5	Metal homeostasis factor ATX1	Saccharomyces cerevisiae	Interface	Interface	1	4		Cu
3re7_2	6	Ferritin, middle subunit	Rana catesbeiana		Interface	3	3		Cu
1aqr_A	7	Copper metallothionein 1-2	Saccharomyces cerevisiae	Substrage storage	Within a Chain	4	3		Cu
1rju_1	8	Copper metallothionein 1-2		Substrage storage	Within a Chain	8	0		Cu
1aop_1	5	Sulfite reductase [NADPH] hemoprotein beta-component	Escherichia coli B		Within a chain	1	4	including iron cluster	Fe
1su7_2	5	Carbon monoxide dehydrogenase 2	Carboxydothermus hydrogenoformans		Within a chain	3	2	including iron cluster	Fe
1tkp_1	5	DNA protection during starvation protein	Halobacterium salinarum		Interface	1	4	including iron cluster	Fe
3b0g_1	5	Nitrite reductase	Nicotiana tabacum		Within a chain	2	3	including iron cluster	Fe
3cb8_1	5	Pyruvate formate-lyase 1-activating enzyme	Escherichia coli		Within a chain	2	3	including iron cluster	Fe
3git_1	5	Carbon monoxide dehydrogenase/acetyl-CoA synthase subunit alpha	Moorella thermoacetica		Within a chain	1	4	including iron cluster	Fe
4g39_2	5	Sulfite reductase [NADPH] hemoprotein beta-component	Escherichia coli K-12		Within a chain	2	3	including iron cluster	Fe
4iwk_2	5	protein	Pseudo-nitzschia multiseries	Catalytic direct participation in reaction mechanism of the enzyme; substrate transport	Within a chain	4	1		Fe
4lyu_2	5	Ferritin, middle subunit	Rana catesbeiana		Within a chain	3	2		Fe
4ras_5	5	Oxidoreductase, NAD-binding/iron-sulfur cluster-binding protein	Nitratireductor pacificus pht-3B		Within a chain	1	4	including iron cluster	Fe
4u0p_1	5	Lipoyl synthase 2	Thermosynechococcus elongatus BP-1		Within a chain	1	4		Fe
4wcx_4	5	Biotin and thiamin synthesis associated	Thermoanaerobacter italicus Ab9		Within a chain	1	4	including iron cluster	Fe
5c4i_2	5	Oxalate oxidoreductase subunit delta	Moorella thermoacetica ATCC 39073		Within a chain	1	4	including iron cluster	Fe
5h8y_8	5	Sulfite reductase [ferredoxin], chloroplastic	Zea mays		Within a chain	1	4	including iron cluster	Fe
5odr_18	5	Heterodisulfide reductase, subunit A	Methanothermococcus thermolithotrophicus		Within a chain	1	4	including iron cluster	Fe
5t5i_1	5	Tungsten formylmethanofuran dehydrogenase subunit fwdF	Methanothermobacter wolfeii		Within a chain	1	4	including iron cluster	Fe
5t5i_13	5	Tungsten formylmethanofuran dehydrogenase subunit fwdF	Methanothermobacter wolfeii		Within a chain	1	4	including iron cluster	Fe
5t5i_14	5	Tungsten formylmethanofuran dehydrogenase subunit fwdG	Methanothermobacter wolfeii		Within a chain	1	4	including iron cluster	Fe
5t5i_16	5	Tungsten formylmethanofuran dehydrogenase subunit fwdF	Methanothermobacter wolfeii		Within a chain	1	4		Fe
5t5i_2	5	Tungsten formylmethanofuran dehydrogenase subunit fwdF	Methanothermobacter wolfeii		Within a chain	1	4		Fe
5t5i_6	5	Tungsten formylmethanofuran dehydrogenase subunit fwdF	Methanothermobacter wolfeii		Within a chain	1	4		Fe
5t5i_7	5	Tungsten formylmethanofuran dehydrogenase subunit fwdF	Methanothermobacter wolfeii		Within a chain	1	4		Fe
1hfe_2	6	Periplasmic [Fe] hydrogenase large subunit	Desulfovibrio vulgaris str. Hildenborough	Catalytic direct participation in reaction mechanism of the enzyme	Within a chain	2	4	including iron cluster	Fe
1oao_3	6	Carbon monoxide dehydrogenase/acetyl-CoA synthase subunit alpha	Moorella thermoacetica	Catalytic direct participation in reaction mechanism of the enzyme	Within a chain	3	3	including iron cluster	Fe
1oao_5	6	Carbon monoxide dehydrogenase/acetyl-CoA synthase subunit alpha	Moorella thermoacetica	Within a chain	Within a chain	3	3	close packed	Fe
1ru3_1	6	Acetyl-CoA synthase	Carboxydothermus hydrogenoformans	Catalytic direct participation in reaction mechanism of the enzyme	Within a chain	3	3	including iron cluster	Fe
3i01_5	6	Carbon monoxide dehydrogenase/acetyl-CoA synthase subunit alpha	Moorella thermoacetica	Catalytic direct participation in reaction mechanism of the enzyme	Within a chain	4	2	including iron cluster	Fe
4zk6_1	6	Quinolinate synthase A	Pyrococcus horikoshii		Within a chain	2	4	including iron cluster	Fe
5cxm_1	6	Cytochrome b6/f complex iron-sulfur subunit	Synechocystis sp. PCC 6803		Interface	2	4		Fe
1qh8_3	7	Nitrogenase molybdenum-iron protein beta chain	Klebsiella pneumoniae	Electron transfer	Interface	5	2		Fe
4wna_2	7	Nitrogenase molybdenum-iron protein beta chain	Azotobacter vinelandii		Interface	5	2	close packed	Fe
5dd7_1	7	Thiamine-monophosphate kinase	Acinetobacter baumannii		Interface	3	4		Fe
1m1n_2	8	Nitrogenase molybdenum-iron protein alpha chain	Azotobacter vinelandii	Electron transfer	Interface	5	3		Fe
1m1y_1	8	Nitrogenase molybdenum-iron protein beta chain	Azotobacter vinelandii	Electron transfer	Interface	5	3		Fe
3pdi_2	8	Nitrogenase MoFe cofactor biosynthesis protein NifE	Azotobacter vinelandii DJ		No binding chains	4	4	including iron cluster	Fe
3u7q_1	8	Nitrogenase molybdenum-iron protein alpha chain	Azotobacter vinelandii	Catalytic direct participation in reaction mechanism of the enzyme	Within a chain	4	4	including iron cluster	Fe
4jc0_1	8	Ribosomal protein S12 methylthiotransferase RimO	Thermotoga maritima	Catalytic direct participation in reaction mechanism of the enzyme	Within a chain	2	6	including iron cluster	Fe
5n6y_1	8	Nitrogenase vanadium-iron protein alpha chain	Azotobacter vinelandii		Within a chain	4	4	including iron cluster	Fe
5n6y_2	8	Nitrogenase vanadium-iron protein alpha chain	Azotobacter vinelandii		Interface	5	3		Fe
2jft_1	5	SER-THR PHOSPHATASE MSPP	Mycobacterium smegmatis str. MC2 155		Within a chain	2	3		Mg
2wdg_315	5	16S rRNA	Thermus thermophilus HB8		Interface	1	4		Mg
3c9t_1	5	Thiamine monophosphate kinase	Aquifex aeolicus		Interface	3	2		Mg
3c9u_1	5	Thiamine monophosphate kinase	Aquifex aeolicus		Interface	2	3		Mg
3f1e_2	5	16S rRNA	Thermus thermophilus		Interface	2	3		Mg
3hux_193	5	23S ribosomal RNA	Thermus thermophilus HB8		Interface	2	3		Mg
3i8g_8	5	16S ribosomal RNA	Thermus thermophilus HB8		Interface	2	3		Mg
3i8h_57	5	16S ribosomal RNA	Thermus thermophilus HB8		Interface	2	3		Mg
3i8h_953	5	16S ribosomal RNA	Thermus thermophilus HB		Interface	4	1		Mg
3tvf_26	5	30S ribosomal protein S12	Thermus thermophilus HB8		Interface	2	3		Mg
3u4m_1	5	RNA (80-MER)	Thermus thermophilus		Interface	3	2		Mg
3v27_246	5	23S ribosomal RNA	Thermus thermophilus HB8		Interface	3	2		Mg
3v2f_12	5	23S ribosomal RNA	Thermus thermophilus		Interface	3	2		Mg
3vyt_2	5	protein	Thermococcus kodakarensis KOD1		Within a chain	3	2		Mg
4av6_A	5	K(+)-stimulated pyrophosphate-energized sodium pump	Thermotoga maritima		Within a chain	2	3		Mg
4dr6_61	5	16S rRNA	Thermus thermophilus HB8		No binding chains	5	0		Mg
4dv1_102	5	30S ribosomal protein S8	Thermus thermophilus HB8		Interface	2	3		Mg
4ji4_20	5	16S rRNA	Thermus thermophilus HB8		Interface	4	1		Mg
4l7w_1	5	HD domain-containing protein 2	Homo sapiens		Within a chain	3	2		Mg
4lqj_2	5	Ferritin, middle subunit	Rana catesbeiana		Within a chain	2	3		Mg
4lqj_2	5	Ferritin, middle subunit	Rana catesbeiana		Within a chain	2	3		Mg
4nvv_74	5	50S ribosomal protein L22	Thermus thermophilus		Interface	2	3		Mg
4nvz_52	5	50S ribosomal protein L2	Thermus thermophilus		Interface	2	3		Mg
4qd1_40	5	23S Ribosomal RNA	Thermus thermophilus HB8		Interface	3	2		Mg
4umj_1	5	GERANYLTRANSTRANSFERASE	Pseudomonas aeruginosa PAO1		Within a chain	4	1		Mg
5br8_41	5	Thermus thermophilus HB8 genomic DNA, complete genome	Thermus thermophilus		Within a chain	5	0		Mg
5cc8_2	5	Thiamine-monophosphate kinase	Acinetobacter baumannii		Interface	3	2		Mg
5lrt_1	5	Depupylase	Acidothermus cellulolyticus		Within a chain	4	1		Mg
5lzq_2	5	K(+)-stimulated pyrophosphate-energized sodium pump	Thermotoga maritima		Within a chain	4	1		Mg
3d5b_110	6	50S ribosomal protein L17	Thermus thermophilus HB27		Interface	5	1		Mg
3d5b_194	6	23S rRNA	Thermus thermophilus HB27		Interface	5	1		Mg
3f1f_162	6	50S ribosomal protein L3	Thermus thermophilus		Interface	6	0		Mg
3f1h_40	6	23S rRNA	Thermus thermophilus		Interface	2	4		Mg
4a01_1	6	Proton pyrophosphatase	Vigna radiata		Within a chain	2	4		Mg
4btc_34	6	16S RIBOSOMAL RNA	Thermus thermophilus HB8		Interface	3	3		Mg
4cr1_15	6	16S RIBOSOMAL RNA	Thermus thermophilus HB8		Interface	3	3		Mg
4nvv_12	6	23S Ribosomal RNA	Thermus thermophilus		Interface	3	3		Mg
4nvz_41	6	23S Ribosomal RNA	Thermus thermophilus		Interface	4	2		Mg
4qd1_117	6	50S ribosomal protein L2	Thermus thermophilus HB8		Interface	1	5		Mg
1iw7_48	7	DNA-directed RNA polymerase subunit beta'	Thermus thermophilus		No binding chains	3	4		Mg
3v2d_58	7	23S ribosomal RNA	Thermus thermophilus		Interface	3	4		Mg
4j6w_1	7	Protein hfq	Pseudomonas aeruginosa PAO1		No binding chains	4	3		Mg
4nvv_1	7	23S Ribosomal RNA	Thermus thermophilus		Interface	4	3		Mg
1vqo_45	8	23S ribosomal RNA	Haloarcula marismortui		Interface	4	4		Mg
3i8g_188	8	16S ribosomal RNA	Thermus thermophilus HB8		Interface	4	4		Mg
3i8g_274	8	16S ribosomal RNA	Thermus thermophilus HB8		Interface	4	4		Mg
3i8h_34	8	16S ribosomal RNA	Thermus thermophilus HB8		Interface	5	3		Mg
3i8h_378	8	16S ribosomal RNA	Thermus thermophilus HB8		Interface	4	4		Mg
4nvz_337	8	50S ribosomal protein L22	Thermus thermophilus		Interface	5	3		Mg
1smy_1	10	DNA-directed RNA polymerase subunit beta'	Thermus thermophilus		Interface	4	6		Mg
2qa4_12	10	23S ribosomal RNA	Haloarcula marismortui		Interface	2	8		Mg
3i8g_356	10	16S ribosomal RNA	Thermus thermophilus HB8		Interface	6	4		Mg
4nvz_35	10	23S Ribosomal RNA	Thermus thermophilus		Interface	6	4		Mg
1e6a_1	5	Inorganic pyrophosphatase	Saccharomyces cerevisiae		Within a chain	3	2		Mn
1gx6_1	5	Genome polyprotein	Hepatitis C virus (isolate BK)		Within a chain	2	3		Mn
3arc_3	5	Photosystem Q(B) protein	Thermosynechococcus vulcanus		Interface	2	3		Mn
4fby_7	5	Photosystem Q(B) protein 1	Thermosynechococcus elongatus BP-1		Within a chain	2	3		Mn
4il6_21	5	Photosystem Q(B) protein	Thermosynechococcus vulcanus		Interface	4	1		Mn
3d34_2	5	Spondin-2	Homo sapiens		Interface	3	2		Ni
1rxs_1	6	Uridine phosphorylase	Escherichia coli		No binding chains	3	3	cluster	V
1rxs_3	6	Uridine phosphorylase	Escherichia coli		No binding chains	3	3	cluster	V
1rxs_9	6	Uridine phosphorylase	Escherichia coli		No binding chains	3	3	cluster	V
2g8h_1	6	Ribonuclease H	Bacillus halodurans		No binding chains	2	4	cluster	V
1iuj_1	5	hypothetical protein TT1380	Thermus thermophilus	Not physiological	Within a Chain	3	2		Zn
2vqg_6	5	UNCHARACTERIZED PROTEIN CGL0972	Corynebacterium glutamicum		Within a Chain	3	2		Zn
3akq_1	5	xylanase	Trichoderma longibrachiatum		Within a Chain	3	2		Zn
3fmu_1	5	Versatile peroxidase VPL2	Pleurotus eryngii		Within a Chain	2	3		Zn
4jjj_A	5	Cellulose 1,4-beta-cellobiosidase	Thermobifida fusca		Within a Chain	3	2		Zn
4wb7_1	5	cAMP-dependent protein kinase inhibitor alpha	Homo sapiens		Interface	1	4		Zn
5ioe_1	5	Spheroplast protein Y	Escherichia coli		Interface	3	2		Zn
5wo1_3	5	Spheroplast protein Y	Escherichia coli		Within a Chain	3	2		Zn
2eul_6	6	Anti-cleavage anti-GreA transcription factor Gfh1	Thermus thermophilus HB8		Interface	3	3		Zn
5ioe_6	6	Spheroplast protein Y	Escherichia coli		Within a Chain	4	2		Zn
